# Supplementary material
Source: publisher figshare collection journal article supplement (https://sage.figshare.com/ndownloader/files/16450349)

Figure S1 – Wastes I (A), II (B), IIIa (C), IIIb (D), IIIc (E) and IIId (F)

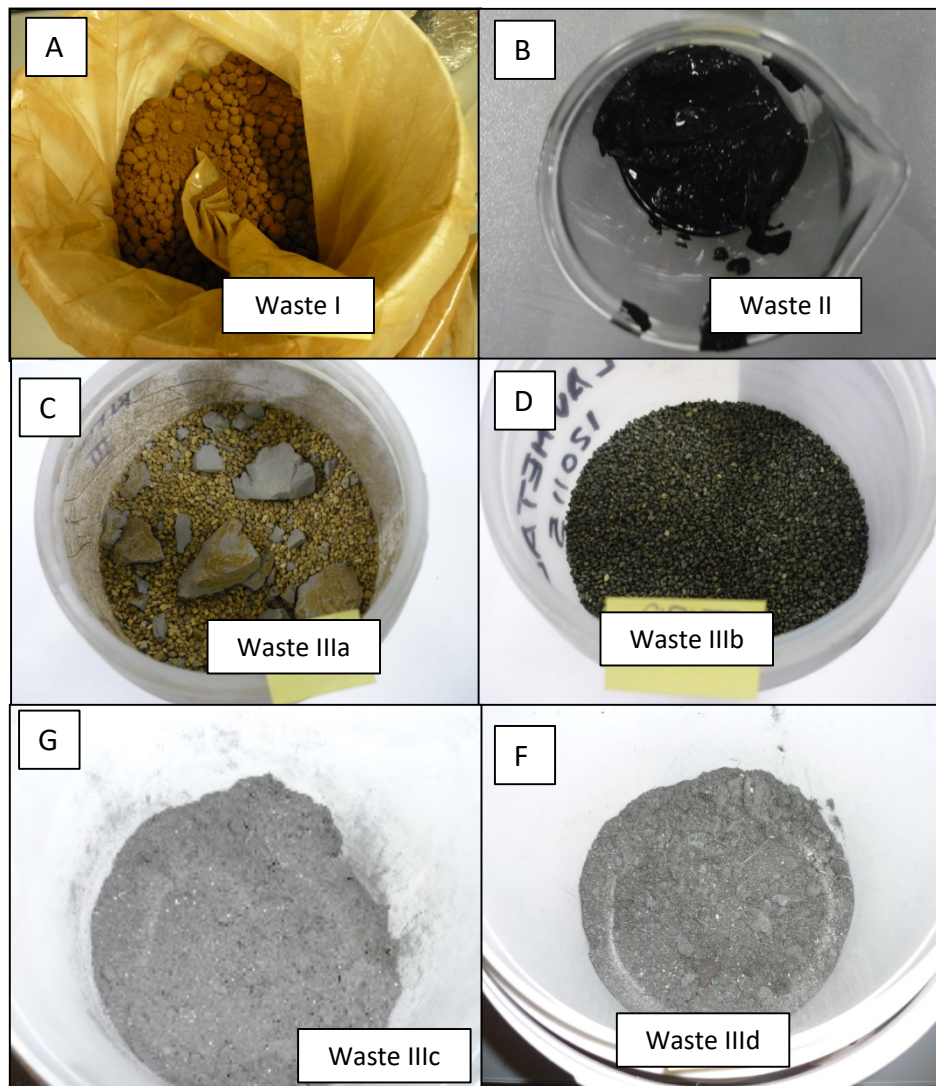

Figure S2 – Paint used as stabilizer

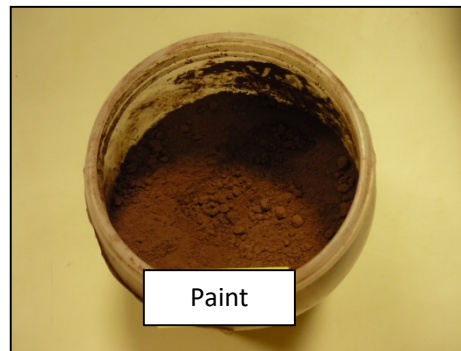

Supplement: Supplementary file 1 [file 16450349]
